# Supplementary material for: Osteoimmunology of Spondyloarthritis
Source: MDPI journal article supplement (doi:10.3390/ijms241914924), 2023-10-05
Supplement: s1 [file s1]

**Supplementary Table S1.** Main studies investigating [<sup>18</sup>F]fluoride PET/CT.

| Author             | Study type      | N                                                                                              | Follow-up | Results                                                                                                                                                                                                                                                          | Comments                                                                                               |
|--------------------|-----------------|------------------------------------------------------------------------------------------------|-----------|------------------------------------------------------------------------------------------------------------------------------------------------------------------------------------------------------------------------------------------------------------------|--------------------------------------------------------------------------------------------------------|
| Lee SJ, 2020       | Longitudinal    | 28                                                                                             | 4.5 y     | The baseline LBR of posterior joints had significant (weak) positive correlation with follow-up BASDAI score ( $r=0.394$ , $P=0.042$ ).                                                                                                                          |                                                                                                        |
| Buchbender C, 2015 | Cross-sectional | 10                                                                                             |           | BME rather than chronic changes (FL) is associated with osteoblastic activity, while the combination of BME and FL showed the highest <sup>18</sup> F-f uptake.                                                                                                  |                                                                                                        |
| Kim K, 2020        | Longitudinal    | 27                                                                                             | 2 y       | The baseline SUV max of the spine (but not of the SIJ) predicted BASDAI 50 response at 2 years to anti-TNF (OR with 95%CI: 14.00 1.37–14.29, $p=0.009$ )                                                                                                         |                                                                                                        |
| Kim K, 2020        | Cross-sectional | 12                                                                                             |           | Significant correlation between the $SUV_{mean}$ of the vertebral corners and DXA measured BMD at the lumbar spine ( $r=0.402$ $p=0.005$ ).                                                                                                                      | The correlation is likely to express the artefactual increase of BMD due to pathologic bone formation. |
| Seung SM, 2020     | Retrospective   | 68 patients with LBP. 49 satisfied ASAS criteria, 19 did not (and were considered as controls) |           | More common PET-positive findings in the ASAS-classified group than in the control group (79% vs 15%, $p<0.001$ ).                                                                                                                                               |                                                                                                        |
| Fischer DR, 2012   | Cross-sectional | 10                                                                                             |           | Increased <sup>18</sup> F-f uptake in PET/CT is “only modestly” associated with bone marrow edema on MRI in the spine and SIJ (Cohen’s K value = 0.25, $p$ value not provided)                                                                                   |                                                                                                        |
| Idolazzi L, 2016   | Cross-sectional | 29                                                                                             |           | The number of <sup>18</sup> F-f PET/CT positive sites was significantly higher in patients with severe functional impairment and higher disease activity and was positively related to both BASDAI ( $r=0.336$ ; $P=0.036$ ) and ASDAS ( $r=0.408$ ; $P=0.014$ ) |                                                                                                        |
| Strobel K, 2020    | Cross-sectional | 15 AS, 13 LBP controls                                                                         |           | The AUC for sacroiliitis at the <sup>18</sup> F-f PET/CT was 0.84.                                                                                                                                                                                               | Criteria for the definition of “sacroiliitis” at PET/CT not provided                                   |
| Raynal M, 2019     | Cross-sectional | 23                                                                                             |           | No correlation between <sup>18</sup> F-f PET/TC findings and CT findings (erosion, ankylosis scores). Significant correlation between the 18 F-f PET activity score and the inflammation score SPARCC (ICC [95% CI] = 0.61 [0.26; 0.82]; $p=0.001$ ).            | FL not assessed                                                                                        |
| Ouichka R, 2019    | Cross-sectional | 23                                                                                             |           | Abnormal uptake by the SIJ on <sup>18</sup> F-f PET is more frequent (87.0%) than inflammatory                                                                                                                                                                   |                                                                                                        |

|                   |                 |    |                                                                                                                                                                                                                                                                                                                                    |                                           |
|-------------------|-----------------|----|------------------------------------------------------------------------------------------------------------------------------------------------------------------------------------------------------------------------------------------------------------------------------------------------------------------------------------|-------------------------------------------|
|                   |                 |    | (43.5%) and structural sacroiliitis (65.2%) on MRI. The $^{18}\text{F}$ -f PET activity score and SUVmax had good correlations with inflammatory sacroiliitis but not with structural lesions on MRI.                                                                                                                              |                                           |
| Toussirot E, 2015 | Cross-sectional | 15 | At SIJ, good concordance between active inflammatory areas depicted on $^{18}\text{F}$ -f PET-CT and MRI inflammatory lesions. For spinal lesions, the number of fluoride lesions on PET-CT scans largely exceeded those detected by spinal MRI (33 vs. 4). There was also a relationship between SIJ MRI score and SIJ/SUV ratio. | Letter to the editor, full data not shown |
| Lee SG, 2015      | Cross-sectional | 12 | A type A CIL (OR=3.2, 95% CI=1.6-6.5, $p=0.001$ ), type B CIL (OR=59.9, 95% CI=23.5-151.5, $p<0.001$ ) and syndesmpophyte (OR=21.8, 95% CI=5.5-85.2, $p<0.001$ ) were significantly associated with an increased $^{18}\text{F}$ -f PET/CT uptake lesion.                                                                          |                                           |

Bone marrow edema; CIL, corner inflammatory lesion; DXA, dual-energy X-ray absorptiometry; FL, fatty lesions; LBR, lesion-to-background ratio; SIJ, sacroiliac joints.

**Supplementary Table S2.** Clinical and radiographic features of the explored sample. AS, ankylosing spondylitis; nr-axSpA, non-radiographic axial spondyloarthritis; p-SpA; peripheral spondyloarthritis.

|                              | AS  | Nr-axSpA | SpA with both axial and peripheral involvement | Exclusively p-SpA involvement | Total |
|------------------------------|-----|----------|------------------------------------------------|-------------------------------|-------|
| <b>Males</b>                 | 148 | 66       | 124                                            | 151                           | 489   |
| <b>Pre-menopausal women</b>  | 59  | 43       | 73                                             | 114                           | 289   |
| <b>Post-menopausal women</b> | 32  | 17       | 88                                             | 161                           | 298   |
| <b>Total</b>                 | 239 | 126      | 285                                            | 426                           | 1076  |

**Supplementary Table S3.** Prevalence of DXA assessment at baseline and at follow-up. DXA; dual-energy X-rays absorptiometry; OR, odds ratio, CI, confidence interval.

|                               | DXA at the beginning of therapy | OR (95% CI) vs postmenopausal women | DXA at follow-up | OR (95% CI) vs postmenopausal women |
|-------------------------------|---------------------------------|-------------------------------------|------------------|-------------------------------------|
| <b>Males</b>                  | 20%                             | 0.28 (0.21-0.39)<br><sub>a,b</sub>  | 14%              | 0.55 (0.39-0.80)<br><sub>a,b</sub>  |
| <b>Women, pre-menopausal</b>  | 30%                             | 0.48 (0.34-0.67)<br><sub>a</sub>    | 21%              | 0.72 (0.46-1.06)                    |
| <b>Women, post-menopausal</b> | 47%                             | Reference                           | 38%              | Reference                           |

<sup>a</sup>  $p<0.0005$  vs. reference; <sup>b</sup>  $p<0.005$  vs. pre-menopausal women.

**Supplementary Table S4.** Prevalence of ALP, other BTMs and 25(OH)D assessment at baseline and at follow-up. ALP, alkaline phosphatase; BTM, bone turnover markers; 25(OH)D, serum 25 hydroxy vitamin D concentration; OR, odds ratio, CI, confidence interval.

|                               | ALP | OR (95% CI) vs postmenopausal women | Other BTMs | OR (95% CI) vs postmenopausal women | 25(OH)D assay | OR (95% CI) vs postmenopausal women |
|-------------------------------|-----|-------------------------------------|------------|-------------------------------------|---------------|-------------------------------------|
| <b>Males</b>                  | 19% | 0.36 (0.26-0.49) <sup>a,b</sup>     | 7%         | 0.19 (0.12-0.29) <sup>a,b</sup>     | 40%           | 0.43 (0.32-0.57) <sup>a,b</sup>     |
| <b>Women, pre-menopausal</b>  | 35% | 0.80 (0.58-1.13)                    | 20%        | 0.72 (0.46- 0.99) <sup>c</sup>      | 51%           | 0.68 (0.49-0.94) <sup>c</sup>       |
| <b>Women, post-menopausal</b> | 40% | Reference                           | 27%        | Reference                           | 61%           | Reference                           |

<sup>a</sup> p<0.0005 vs reference; <sup>b</sup> p<0.005 vs. pre-menopausal women; <sup>c</sup> p<0.05 vs reference.

**Supplementary Table S5.** Prevalence of vitamin D supplementation. OR, odds ratio, CI, confidence interval.

|                               | Supplemented with vitamin D | OR (95% CI) vs postmenopausal women |
|-------------------------------|-----------------------------|-------------------------------------|
| <b>Males</b>                  | 60%                         | 0.23 (0.15-0.33) <sup>a,b</sup>     |
| <b>Women, pre-menopausal</b>  | 86%                         | 0.94 (0.58-1.51)                    |
| <b>Women, post-menopausal</b> | 87%                         | Reference                           |

<sup>a</sup> p<0.0005 vs. reference; <sup>b</sup> p<0.005 vs. pre-menopausal women.
